# Supplementary material
Source: Elsevier journal article supplement (https://www.sciencedirect.com/science/article/pii/S1885585718300525)
Supplement: mmc1 [file S1885585718300525:mmc1.pdf]

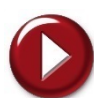

## Supplementary material

### Differential Prognostic Impact on Mortality of Myocardial Infarction Compared With Bleeding Severity in Contemporary Acute Coronary Syndrome Patients

#### SUPPLEMENTARY MATERIAL

**Table 1 of the supplementary material**

Adjusted Effect (HR) of Postdischarge MI and BARC Bleeding as a Whole, on Subsequent All-cause Mortality

|                                                      | Adjusted HR<br>(95%CI) | <i>P</i> |
|------------------------------------------------------|------------------------|----------|
| <i>Postdischarge MI (time-varying exposure)</i>      | 5.8 (3.7-9.8)          | < .001   |
| <i>Postdischarge bleeding time-varying exposure)</i> | 5.1 (3.6-7.7)          | < .001   |
| <i>Age ≥ 65 y</i>                                    | 2.1 (1.4-3.1)          | < .001   |
| <i>Female sex</i>                                    | 0.9 (0.7-1.3)          | .58      |
| <i>BMI, kg/m<sup>2</sup></i>                         | 1.0 (0.98-1.1)         | .83      |
| <i>Current smoking</i>                               | 1.2 (0.8-1.7)          | .40      |
| <i>Hypertension</i>                                  | 1.1 (0.8-1.7)          | .48      |
| <i>Diabetes mellitus</i>                             | 1.1 (0.8-1.4)          | .66      |
| <i>Dyslipidemia</i>                                  | 0.7 (0.5-0.9)          | .03      |
| <i>Prior CAD</i>                                     | 1.2 (0.9-1.6)          | .36      |
| <i>Prior vascular disease<sup>a</sup></i>            | 1.9 (1.4-2.6)          | < .001   |
| <i>History of heart failure or LVEF &lt; 40%</i>     | 3.3 (2.4-4.3)          | < .001   |
| <i>History of bleeding<sup>b</sup></i>               | 1.6(1.1-2.3)           | .02      |

|                                                 |                |        |
|-------------------------------------------------|----------------|--------|
| <i>COPD</i>                                     | 1.4 (1.02-2.0) | .04    |
| <i>Prior malignant disease</i>                  | 1.9 (1.3-2.9)  | < .001 |
| <i>ACS presentation:</i>                        |                |        |
| Unstable angina                                 | Ref.           | Ref.   |
| STEMI                                           | 1.3 (0.8-2.4)  | .38    |
| NSTEMI                                          | 1.9 (1.0-3.7)  | .04    |
| <i>Serum creatinine (per 1 mg/dL increase )</i> | 1.5 (1.03-2.2) | .03    |
| <i>Hemoglobin (per 1 g/dL increase)</i>         | 0.9 (0.8-0.9)  | .001   |
| <i>Multivessel coronary disease</i>             | 1.6 (1.2-2.2)  | .003   |
| <i>In-hospital PCI</i>                          | 0.6 (0.4-0.9)  | .005   |
| <i>In-hospital CABG</i>                         | 0.6 (0.3-1.2)  | .19    |
| <i>DAPT at discharge:</i>                       |                |        |
| No DAPT                                         | Ref.           | Ref.   |
| Aspirin plus prasugrel                          | 1.0 (0.4-2.3)  | .99    |
| Aspirin plus ticagrelor                         | 0.4 (0.2-1.0)  | .05    |
| Aspirin plus clopidogrel                        | 1.2 (0.7-1.9)  | .50    |
| <i>Oral anticoagulant at discharge</i>          | 1.4 (1.0-1.9)  | .07    |
| <i>Proton pump inhibitor at discharge</i>       | 1.2 (0.9-1.6)  | .08    |
| <i>Study center</i>                             | 0.8 (0.6-1.2)  | .28    |

95%CI, 95% confidence interval; ACS, acute coronary syndrome; BARC, bleeding academic research consortium; BMI, body mass index; CAD, coronary artery disease; CABG, coronary artery bypass graft; COPD, chronic obstructive pulmonary disease; DAPT, dual antiplatelet therapy; HR, hazard ratio; LVEF, left ventricular ejection fraction; MI, myocardial infarction; NSTEMI, non-ST-elevation acute myocardial infarction; PCI, percutaneous coronary intervention; STEMI, ST-segment elevation myocardial infarction.

<sup>a</sup>Denots prior stroke or peripheral arterial disease.

<sup>b</sup>Denotes prior hospitalization for bleeding and/or in-hospital BARC type 2, BARC type 3, and BARC type 4 bleeding.

**Table 2 of the supplementary material**

Adjusted Effect (HR) of Postdischarge MI and the Specific Type of BARC Bleeding (Bleeding Severity),  
on Subsequent All-cause Mortality

|                                                               | Adjusted HR<br>(95%CI) | <i>P</i> |
|---------------------------------------------------------------|------------------------|----------|
| <i>Postdischarge MI (time-varying exposure)</i>               | 6.6 (4.2-10.5)         | < .001   |
| <i>Postdischarge BARC 2 bleeding (time-varying exposure)</i>  | 1.7 (1.2-3.1)          | .009     |
| <i>Postdischarge BARC 3a bleeding (time-varying exposure)</i> | 3.3 (1.9-5.6)          | <.001    |
| <i>Postdischarge BARC 3b bleeding (time-varying exposure)</i> | 7.2 (3.4-15.3)         | < .001   |
| <i>Postdischarge BARC 3c bleeding (time-varying exposure)</i> | 26.5 (15.4-45.7)       | < .001   |
| <i>Age ≥ 65 years</i>                                         | 2.2 (1.5-3.3)          | < .001   |
| <i>Female sex</i>                                             | 0.9 (0.6-1.3)          | .63      |
| <i>BMI, kg/m<sup>2</sup></i>                                  | 1.01 (0.98-1.04)       | .38      |
| <i>Current smoking</i>                                        | 1.3 (0.9-2.0)          | .16      |
| <i>Hypertension</i>                                           | 1.2 (0.8-1.8)          | .36      |
| <i>Diabetes mellitus</i>                                      | 1.1 (0.8-1.6)          | .38      |
| <i>Dyslipidemia</i>                                           | 0.8 (0.6-1.1)          | .09      |
| <i>Prior CAD</i>                                              | 1.2 (0.9-1.6)          | .33      |
| <i>Prior vascular disease<sup>a</sup></i>                     | 1.9 (1.3-2.6)          | < .001   |
| <i>History of heart failure or LVEF &lt; 40%</i>              | 3.6 (2.7-4.8)          | < .001   |
| <i>History of bleeding<sup>b</sup></i>                        | 1.5 (1.0-2.2)          | .05      |
| <i>COPD</i>                                                   | 1.6 (1.1-2.4)          | .01      |
| <i>Prior malignant disease</i>                                | 2.1 (1.4-3.3)          | .001     |
| <i>ACS presentation:</i>                                      |                        |          |

|                                                 |               |      |
|-------------------------------------------------|---------------|------|
| Unstable angina                                 | Ref.          | Ref. |
| STEMI                                           | 1.4 (0.8-2.6) | .32  |
| NSTEMI                                          | 2.1 (1.0-4.1) | .04  |
| <i>Serum creatinine (per 1 mg/dL increase )</i> | 1.6 (1.0-2.4) | .03  |
| <i>Hemoglobin (per 1 g/dL increase)</i>         | 0.9 (0.8-1.0) | .001 |
| <i>Multivessel coronary disease</i>             | 1.6 (1.2-2.2) | .004 |
| <i>In-hospital PCI</i>                          | 0.6 (0.4-0.9) | .01  |
| <i>In-hospital CABG</i>                         | 0.6 (0.3-1.3) | .18  |
| <i>DAPT at discharge:</i>                       | Ref.          | Ref. |
| No DAPT                                         | 1.1 (0.4-2.6) | .86  |
| Aspirin plus prasugrel                          | 0.4 (0.2-1.1) | .07  |
| Aspirin plus ticagrelor                         | 1.1 (0.7-1.8) | .73  |
| Aspirin plus clopidogrel                        |               |      |
| <i>Oral anticoagulant at discharge</i>          | 1.5 (1.0-2.2) | .03  |
| <i>Proton pump inhibitor at discharge</i>       | 1.2 (0.9-1.6) | .18  |
| <i>Study center</i>                             | 0.8 (0.6-1.1) | .14  |

95%CI, 95% confidence interval; ACS, acute coronary syndrome; BARC, bleeding academic research

consortium; BMI, body mass index; CAD, coronary artery disease; CABG, coronary artery bypass

graft; COPD, chronic obstructive pulmonary disease; DAPT, dual antiplatelet therapy; HR, hazard

ratio; LVEF, left ventricular ejection fraction; MI, myocardial infarction; NSTEMI, non-ST-elevation

acute myocardial infarction; PCI, percutaneous coronary intervention; STEMI, ST-segment elevation

myocardial infarction.

<sup>a</sup>Denote prior stroke or peripheral arterial disease.

<sup>b</sup>Denotes prior hospitalization for bleeding and/or in-hospital BARC type 2, BARC type 3, and BARC type 4 bleeding.



**Table 3 of the supplementary material**

Crude Mortality Rate by Postdischarge MI and Bleeding Status, and Their Adjusted Effect (HR) on Subsequent All-cause Mortality, Among the 3588 Patients Discharged With DAPT

|               | Nº of patients | Death, n | Crude mortality rate (per 100 person-years) (95%CI) | Adjusted HR (95%CI) <sup>a</sup> | Attributable mortality <sup>b</sup> No. (%) |
|---------------|----------------|----------|-----------------------------------------------------|----------------------------------|---------------------------------------------|
| Neither event | 2971           | 173      | 3.2 (2.8-3.7)                                       | ---                              | ---                                         |
| MI            | 189            | 39       | 29.5 (22.1-40.5)                                    | 5.7 (3.6-9.3)                    | 32 (12.0)                                   |
| Bleeding      | 428            | 58       | 22.3 (17.1-29.1)                                    | 5.4 (3.6-8.1)                    | 47 (17.5)                                   |

95%CI, 95% confidence interval; ACS, acute coronary syndrome; BARC, bleeding academic research

consortium; BMI, body mass index; CAD, coronary artery disease; CABG, coronary artery bypass

graft; COPD, chronic obstructive pulmonary disease; DAPT, dual antiplatelet therapy; HR, hazard

ratio; LVEF, left ventricular ejection fraction; MI, myocardial infarction; NSTEMI, non-ST-elevation

acute myocardial infarction; PCI, percutaneous coronary intervention; STEMI, ST-segment elevation

myocardial infarction.

<sup>a</sup>Adjusted for: age  $\geq 65$  years, female sex, body mass index ( $\text{kg}/\text{m}^2$ ), current smoking, hypertension, dyslipidemia, diabetes mellitus, prior coronary artery disease, history of congestive heart failure or LVEF  $< 40\%$ , prior vascular disease, history of bleeding, malignant disease, COPD, ACS type, baseline serum creatinine ( $\text{mg}/\text{dL}$ ) and hemoglobin ( $\text{g}/\text{dL}$ ) values, multivessel coronary disease, in-hospital PCI, in-hospital CABG, treatment at discharge, and study center.

<sup>b</sup>Attributable mortality was calculated using the following formula: number of deaths among patients with the attribute (MI or bleeding)  $\times$  [adjusted HR-1]/adjusted HR.

**Table 4 of the supplementary material**

Comparison of the Baseline and Clinical Characteristics of Patients With Data on Follow-up vs  
Patients Lost to Follow-up

|                                             | With data on<br>follow-up<br>n = 4229 | Lost to follow-up<br>n = 202 | <i>P</i> |
|---------------------------------------------|---------------------------------------|------------------------------|----------|
| <b>Demographic and past medical history</b> |                                       |                              |          |
| <i>Age, y</i>                               | 67 [57-77]                            | 66.4 [56-77]                 | .08      |
| <i>BMI, kg/m<sup>2</sup></i>                | 27.9 [25.4-31.1]                      | 27.7 [25.2-30.0]             | .83      |
| <i>Female</i>                               | 1064 (25.2)                           | 57 (28.2)                    | .31      |
| <i>Current smoking</i>                      | 1404 (33.2)                           | 70 (34.7)                    | .80      |
| <i>Hypertension</i>                         | 2779 (65.7)                           | 132 (65.3)                   | .93      |
| <i>Diabetes mellitus</i>                    | 1343 (31.8)                           | 61 (30.2)                    | .79      |
| <i>Dyslipidemia</i>                         | 2800 (66.2)                           | 132 (65.3)                   | .83      |
| <i>Prior CAD</i>                            | 1225 (29.0)                           | 57 (28.2)                    | .90      |
| <i>Prior vascular disease<sup>a</sup></i>   | 584 (13.8)                            | 23 (11.4)                    | .74      |
| <i>Congestive heart failure</i>             | 166 (3.9)                             | 6 (3.0)                      | .91      |
| <i>Prior hospitalization for bleeding</i>   | 108 (2.6)                             | 3 (1.5)                      | .91      |
| <i>COPD</i>                                 | 439 (10.4)                            | 18 (8.9)                     | .84      |
| <i>History of malignant disease</i>         | 330 (7.8)                             | 13 (6.4)                     | .86      |
| <b>At hospital admission</b>                |                                       |                              |          |
| <i>ACS type:</i>                            |                                       |                              |          |
| Unstable angina                             | 310 (7.3)                             | 13 (6.4)                     | .90      |
| NSTEMI                                      | 2297 (54.3)                           | 109 (54.0)                   | .95      |



|                                                 |                  |                  |     |
|-------------------------------------------------|------------------|------------------|-----|
| STEMI                                           | 1622 (38.4)      | 80 (39.6)        | .83 |
| <i>Killip II-IV</i>                             | 663 (15.7)       | 26 (12.9)        | .70 |
| <i>Serum creatinine, mg/dL</i>                  | 0.9 [0.8-1.1]    | 0.89 [0.76-0.97] | .06 |
| <i>Hemoglobin, g/dL</i>                         | 14.1 [12.9-15.2] | 14.3 [13.1-15.5] | .47 |
| <i>LVEF &lt; 40%</i>                            | 449 (10.6)       | 21 (10.4)        | .98 |
| <b>In-hospital management and complications</b> |                  |                  |     |
| <i>Multivessel coronary disease</i>             | 1998 (47.3)      | 93 (45.1)        | .68 |
| <i>PCI</i>                                      | 3110 (73.5)      | 152 (75.2)       | .64 |
| <i>CABG</i>                                     | 232 (5.5)        | 9 (4.5)          | .90 |
| <i>Drug-eluting stent</i>                       | 2447 (57.9)      | 118 (58.4)       | .91 |
| <i>Bare-metal stent</i>                         | 697 (16.5)       | 32 (15.8)        | .92 |
| <i>In-hospital bleeding<sup>b</sup></i>         | 433 (10.2)       | 21 (10.4)        | .98 |
| <b>Treatment at discharge</b>                   |                  |                  |     |
| <i>DAPT</i>                                     | 3588 (84.8)      | 176 (87.1)       | .41 |
| <i>Aspirin</i>                                  | 4008 (95.9)      | 194 (96.0)       | .95 |
| <i>Clopidogrel</i>                              | 2597 (62.3)      | 121 (59.9)       | .59 |
| <i>Ticagrelor</i>                               | 659 (15.8)       | 36 (17.8)        | .75 |
| <i>Prasugrel</i>                                | 391 (9.4)        | 19 (9.4)         | 1   |
| <i>Oral anticoagulant</i>                       | 479 (11.3)       | 18 (8.9)         | .75 |
| <i>Proton pump inhibitor</i>                    | 3847 (91)        | 186 (92.1)       | .61 |

ACS, acute coronary syndrome; BARC, bleeding academic research consortium; BMI, body mass index; CAD, coronary artery disease; CABG, coronary artery bypass graft; COPD, chronic obstructive pulmonary disease; DAPT, dual antiplatelet therapy; HR, hazard ratio; LVEF, left ventricular ejection

fraction; MI, myocardial infarction; NSTEMI, non–ST-elevation acute myocardial infarction; PCI, percutaneous coronary intervention; STEMI, ST-segment elevation myocardial infarction.

Data are expressed as No. (%) or median [interquartile range].

<sup>a</sup>Denotes prior stroke or peripheral arterial disease.

<sup>b</sup>Denotes in-hospital BARC type 2, BARC type 3, and BARC type 4 bleeding.

**Figure 1 of the supplementary material.** Differential impact of postdischarge myocardial infarction vs bleeding severity on subsequent mortality among the 3588 patients discharged with DAPT.

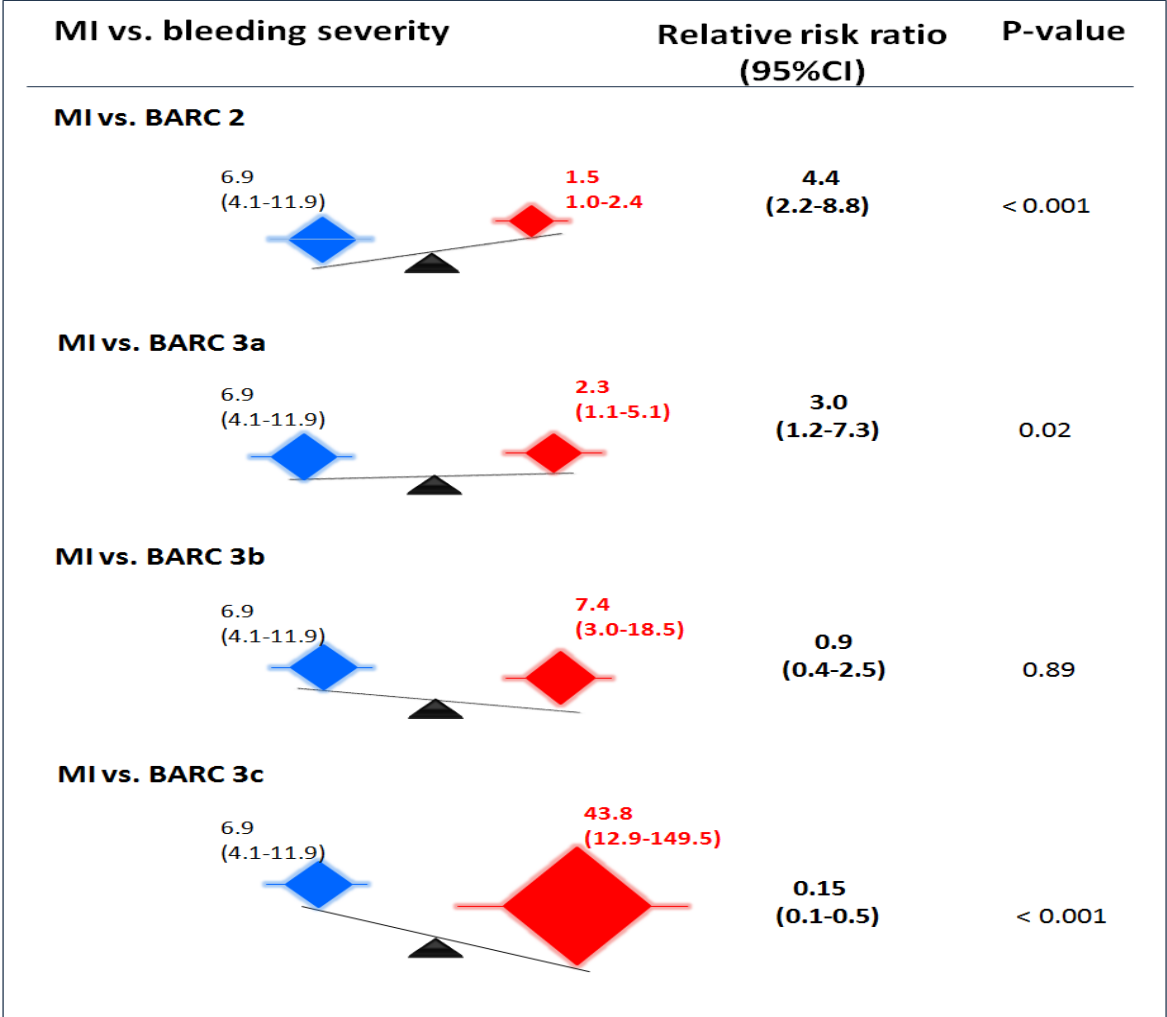

MI and bleeding are represented in blue and red, respectively.

95%CI, 95%confidence interval; BARC, bleeding academic research consortium; DAPT, dual antiplatelet therapy; MI, myocardial infarction.

**Figure 2 of the supplementary material.** Time-association pattern of the impact of postdischarge myocardial infarction vs bleeding on subsequent mortality during follow-up among the 3588 patients discharged with dual antiplatelet therapy.

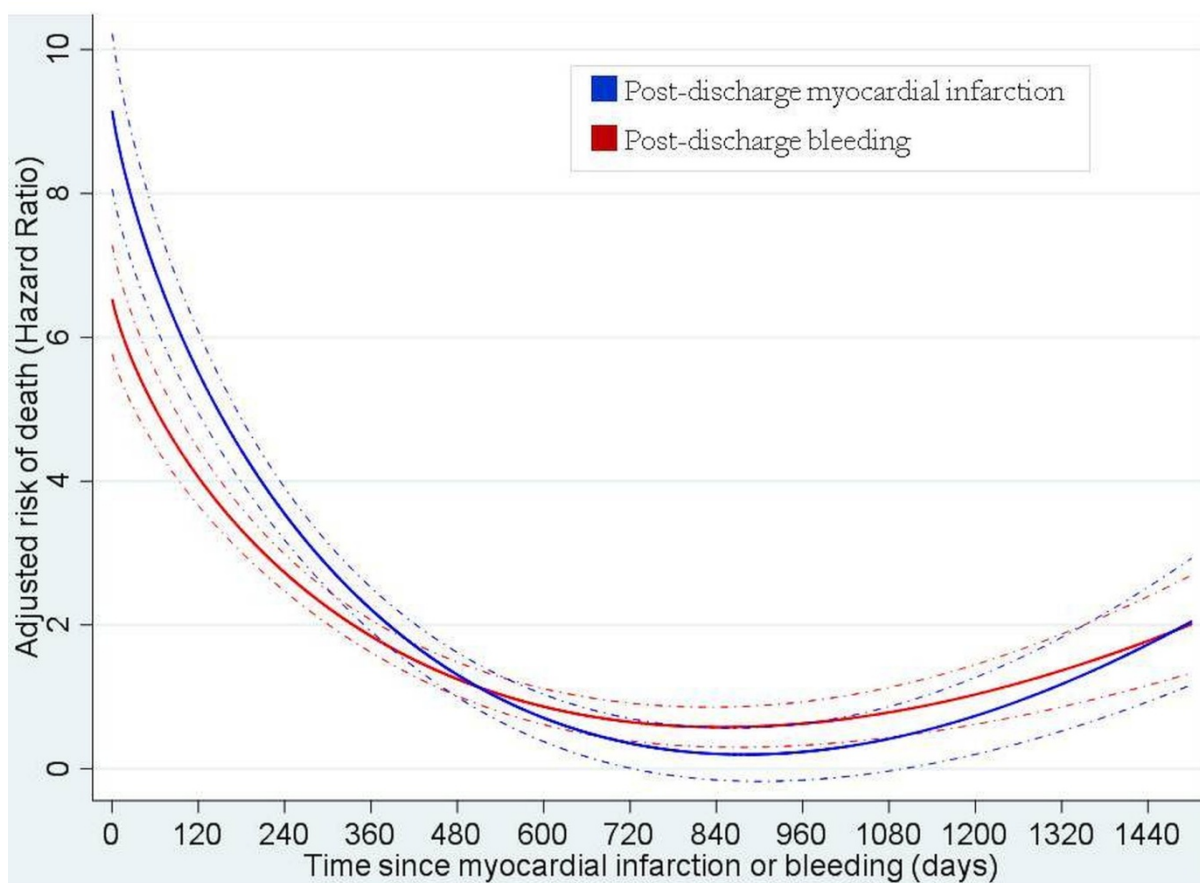

**Figure 3 of the supplementary material.** Specific cause of death among patients with an MI or a bleeding event during follow-up.

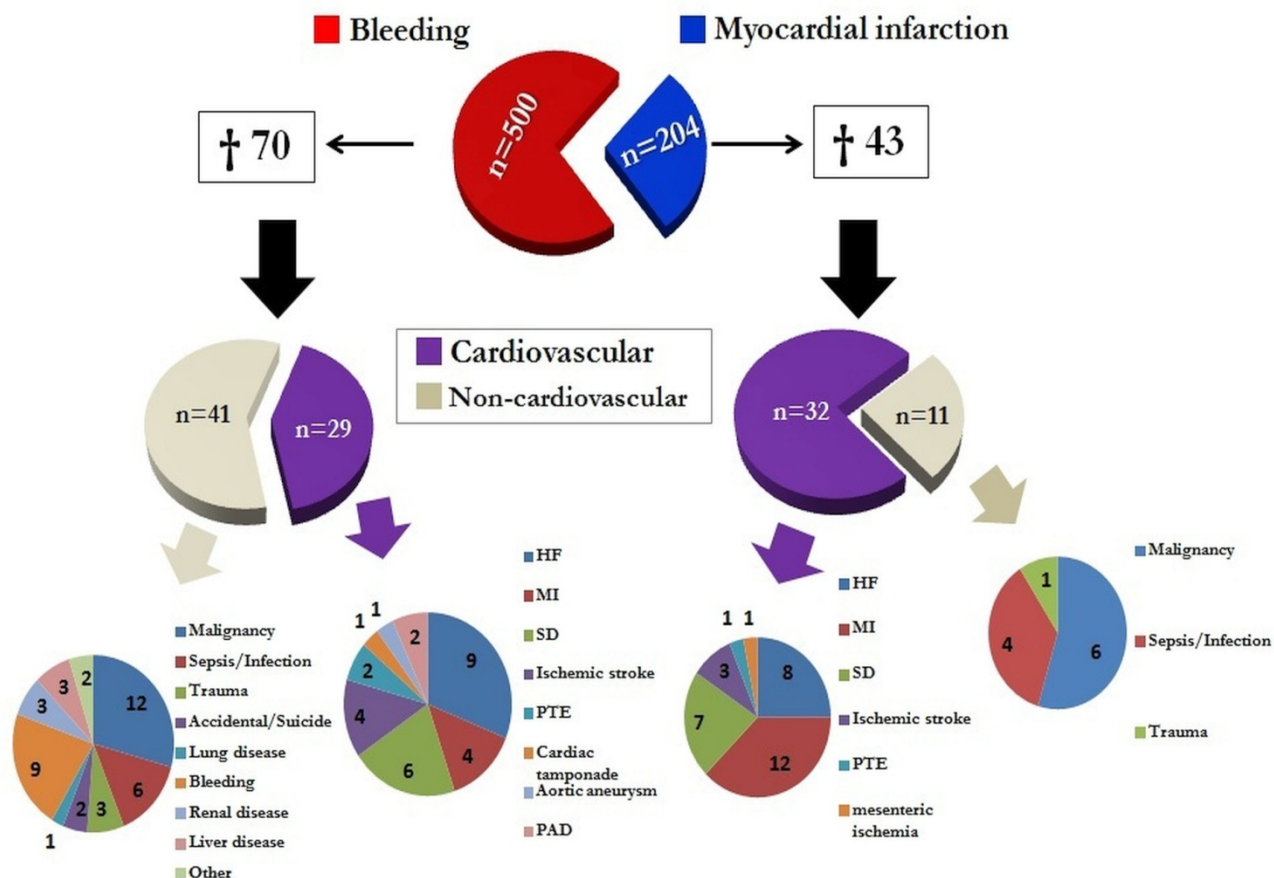

HF, heart failure; MI, myocardial infarction; PAD, peripheral arterial disease; PTE, pulmonary thromboembolism; SD, sudden death.
